# Supplementary material
Source: Springer Nature journal article supplement (https://www.springermedizin.de/resource/supplementary/12936_2009_971_MOESM4_ESM.pdf/9548668)

volumetric water content at 10 cm

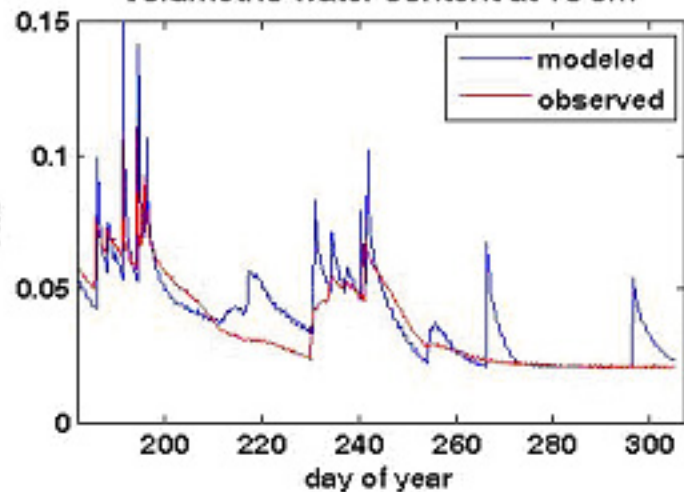

volumetric water content at 20 cm

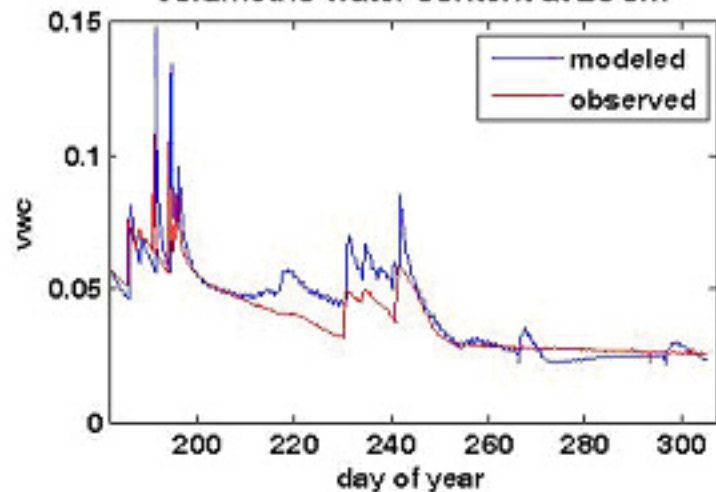

volumetric water content at 50 cm

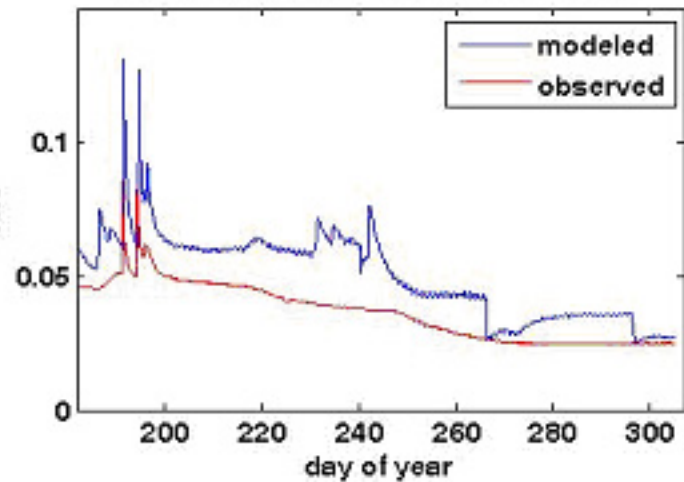

volumetric water content at 100 cm

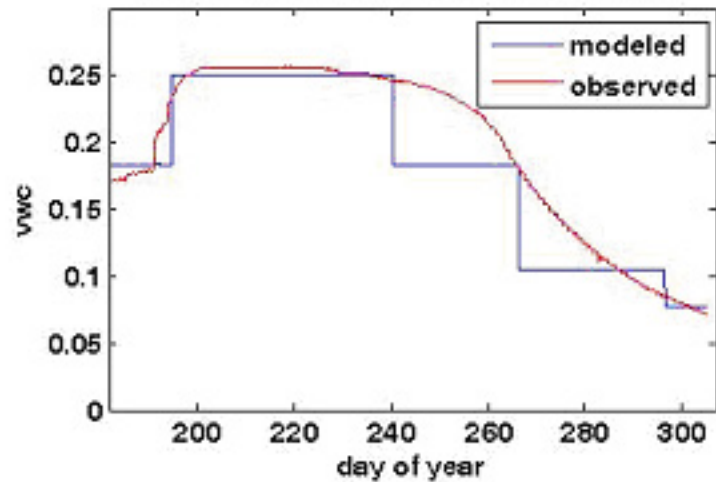

Supplement: MOESM4 [file 9548668]
